1 **Pericentriolar matrix integrity relies on cenexin and Polo-Like Kinase (PLK)1**

2

3 Abrar Aljiboury<sup>1</sup>, Amra Mujcic<sup>1</sup>, Erin Curtis<sup>1</sup>, Thomas Cammerino<sup>1</sup>, Denise Magny<sup>1</sup>, Yiling

4 Lan<sup>1</sup>, Michael Bates<sup>1</sup>, Judy Freshour<sup>1</sup>, Yasir H. Ahmed-Braimeh<sup>1</sup>, Heidi Hehnly<sup>1\*</sup>

5

6 <sup>1</sup> Biology Department, Syracuse University, Syracuse NY

7 \*Lead contact, correspondence: [hhehnly@syr.edu](mailto:hhehnly@syr.edu)

8

9

10

11

12

13

14

15

16

17

18

19

20

21

## 1 **SUMMARY**

2 Polo-Like-Kinase (PLK) 1 activity is associated with maintaining the functional and  
3 physical properties of the centrosome's pericentriolar matrix (PCM). In this study, we use  
4 a multimodal approach of human cells (HeLa) and zebrafish embryos in parallel to  
5 phylogenetic analysis to test the role of a PLK1 binding protein, cenexin, in regulating the  
6 PCM. Our studies identify that cenexin is required for tempering microtubule nucleation  
7 and that a conserved C-terminal PLK1 binding site between humans and zebrafish is  
8 needed for PCM maintenance through mediating PLK1-dependent substrate  
9 phosphorylation events. PCM architecture in cenexin-depleted zebrafish embryos was  
10 rescued with wild-type human cenexin, but not with a C-terminal cenexin mutant (S796A)  
11 deficient in PLK1 binding. We propose a model where cenexin's C-terminus acts in a  
12 conserved manner in eukaryotes, excluding nematodes and arthropods, to anchor PLK1  
13 moderating its potential to phosphorylate PCM substrates required for PCM maintenance  
14 and function.

15

16

17

18

19

20

21

22

## 1    **RESULTS AND DISCUSSION**

2            The centrioles and surrounding pericentriolar matrix (PCM) define the centrosome  
3 as one of the most complex non-membranous organelles in the cell [1,2]. Despite the  
4 centrosome's structural and molecular complexity, the most characterized function of the  
5 centrosome is to nucleate and organize polarized microtubule arrays that generate cell  
6 polarity and form the structural framework for the mitotic spindle [1]. One way this function  
7 is regulated is by the centrosome acting as a scaffold to regulatory molecules, such as  
8 the mitotic kinase, Polo-Like Kinase 1 (PLK1). PLK1 is a major regulator of bi-polar  
9 spindle formation through PLK1-scaffold interactions at mitotic centrosomes/spindle  
10 poles. Once PLK1 is recruited to the centrosome, it modulates the phosphorylation and  
11 assembly of centrosome components, such as Pericentrin and Cep215, which are  
12 needed for  $\gamma$ -tubulin and  $\gamma$ -TuRC recruitment resulting in PCM expansion [3–5]. This  
13 expansion, termed centrosome maturation, is thought to play a crucial role in mitotic  
14 centrosome function during division [4,6]. Following maturation, continued PLK1 activity  
15 has been shown to be essential for PCM maintenance [7,8]. In zebrafish early embryos,  
16 pericentrin was identified to be delivered co-translationally to the centrosome [9] and then  
17 PCM maintenance at centrosomes likely requires PLK1 activity [10].

18            Two centrosome localized PLK1 scaffolds are Cep192 [11] and Odf2 isoform 9  
19 called cenexin, [12–14]. Cep192 is reported to recruit an initial population of PLK1 and  
20 PCM components to centrosomes during bipolar spindle formation in mammalian,  
21 *Drosophila*, and *C. elegans* dividing cells [15–18]. However, much less is known about  
22 cenexin's role during this time and the studies that have been performed were done

1 primarily in murine or human cell models [12–14] with little known about cenexin’s  
2 conservation across phyla.

3         Previous studies identified a cenexin-dependent enrichment of PLK1 at the oldest  
4 mitotic centrosome in human cells [19]. Owing to the nature of centriole duplication, the  
5 two mitotic centrosomes that make up a spindle are inherently asymmetric from one  
6 another. The oldest (mother) mitotic centrosome is enriched with the centriole appendage  
7 protein cenexin, compared to the youngest mitotic centrosome (daughter) [20,21].  
8 Cenexin is unique from other Odf2 isoforms in that it bears a C-terminal extension where  
9 the PLK1 binding site is situated [14]. Cenexin binds to PLK1 following Cyclin Dependent  
10 Kinase (CDK)1 phosphorylation of serine at position 796 (S796) [13]. However, the  
11 relationship between PLK1 and cenexin on the assembly and architecture of the PCM is  
12 unknown. Using a multidisciplinary approach, we found that cenexin’s C-terminus acts in  
13 a conserved manner in eukaryotes, excluding nematodes and arthropods, to anchor  
14 PLK1 moderating its potential to phosphorylate PCM substrates required for PCM  
15 maintenance and function.

16

17         ***Cenexin loss results in PCM specific fragmentation.*** To examine the role of  
18 cenexin in PCM organization during metaphase, cells were depleted of cenexin using  
19 shRNA (cell lines reported in [22], Figure 1A). We noted significant loss of cenexin  
20 expression in cenexin shRNA treated cells (Figure 1A, S1A). We next examined changes  
21 in PCM organization in fixed cells where we immunostained for PCM components  
22 Cep192, pericentrin, Cep215, and  $\gamma$ -tubulin, along with a centriole marker centrin (Figure

1 1A-F). To identify centrosome organization defects, the 2-dimensional area of  
2 centrosome proteins was measured in cenexin depleted cells compared to control cells  
3 (Figure 1B-F). The centriole marker, centrin, and the PCM protein, Cep192, had no  
4 significant changes in centrosome area between cenexin shRNA and control cells (Figure  
5 1A-1C), suggesting that the recruitment of these two proteins and/or maintenance at the  
6 centrosome is independent of cenexin. However, significant increases in Pericentrin,  
7 Cep215, and  $\gamma$ -tubulin area occurred in cenexin shRNA cells compared to controls  
8 (Figure 1A, 1D-F). This significant increase in PCM area was associated with significant  
9 increases in PCM fragmentation that were characterized as splayed or scattered (Figure  
10 S1B, example of scattered in Figure 1G). Strikingly, with scattered phenotypes we could  
11 find dramatic Cep215 puncta throughout the spindle, but centrin decorated centrioles still  
12 nicely positioned at the polar ends of the spindle (Figure 1G) and no significant defects in  
13 centriole number were noted (Figure S1C). Pericentrin and  $\gamma$ -tubulin fragments were  
14 consistently found to colocalize with one another (Figure S1D) and their fragmentation  
15 corresponded with defects in chromosome alignment (Figure 1G), a phenotype identified  
16 in [19]. These studies suggest that cenexin-loss is disrupting aspects of the PCM,  
17 involving Pericentrin, Cep215, and  $\gamma$ -tubulin, but not Cep192 or centriole number (Figure  
18 1H).

19 To identify if there was any change in the amount of centrin, Cep192, Pericentrin,  
20 Cep215, and  $\gamma$ -tubulin recruited to the centrosome, a ratio of mean centrosome intensity  
21 of cenexin shRNA to control shRNA treated cells was calculated. If a ratio of 1 is obtained  
22 (grey dash line), it would indicate that there is no significant change in protein levels at

1 the centrosome (Figure S1E). No significant deviation from 1 occurred for centrin,  
2 Cep192, Pericentrin, Cep215, and  $\gamma$ -tubulin (Figure S1E), suggesting the expanded area  
3 that Pericentrin, Cep215, and  $\gamma$ -tubulin occupy is unlikely due to increased protein  
4 abundance at the centrosome. We propose a model where the packing of Cep215,  
5 Pericentrin, and  $\gamma$ -tubulin complexes are compromised in cenexin depleted cells resulting  
6 in PCM fragmentation and an increase in overall area (Figure 1H).

7

8 ***Cenexin tempers microtubule nucleation by mediating pericentrin***  
9 ***associatedacentrosomal nucleation sites.*** To determine whether cenexin loss and  
10 subsequent PCM disorganization (Figure 1) results in centrosome function defects, we  
11 performed a functional test to monitor mitotic centrosome-mediated microtubule-  
12 nucleating activity over time (Figure 2A). Spindles were disassembled with nocodazole  
13 and examined at different times after nocodazole washout for microtubule nucleation  
14 (Figure 2A). At 0 min washout there was little to no detectable  $\alpha$ -tubulin at mitotic  
15 centrosomes in both control and cenexin-depleted cells (Figure 2B). However, after 5 min  
16 of regrowth, mitotic centrosomes in cenexin-depleted cells demonstrated an increased  
17 ability to nucleate microtubules compared to control cells (Figure 2B-C). Intensity of  $\alpha$ -  
18 tubulin was calculated at mitotic centrosomes, where a significant increase in signal was  
19 noted in cenexin depleted cells compared to control (Figure 2C). We also noted that an  
20 increased number of acentrosomal microtubule nucleation clusters occurred in cenexin  
21 depleted cells ( $8.0 \pm 0.502$  sites) compared to control conditions 5 min post nocodazole  
22 washout ( $4.03 \pm 0.293$  sites, Figure 2B, 2D). To examine when nucleation became

1 elevated at the centrosome and when acentrosomal nucleation sites became significantly  
2 elevated post nocodazole washout we examined metaphase cells 30 sec, 1 min, 2 min,  
3 and 5 min post washout. Strikingly, nucleation was significantly elevated at mitotic  
4 centrosomes at each time point and was drastically more elevated at 5 min (4.34 times  
5 more than control, Figure S2A). This was consistent with acentrosomal nucleation sites  
6 marked by  $\alpha$ -tubulin clusters, where at 5 min twice as many clusters were observed in  
7 cenexin-depleted cells to control cells (Figure S2B). While control and cenexin-depleted  
8 cells had acentrosomal microtubule clusters at 5 min, with cenexin-depleted cells  
9 containing more, we found that by 20 min a nicely formed bipolar spindle still occurred  
10 (Figure 2B). This suggests that the acentrosomal microtubule clusters that form can  
11 transport to the main mitotic centrosomes in both control and cenexin-depleted cells to  
12 assist in the formation of a bipolar mitotic spindle [23,24], but the presence of more  
13 acentrosomal microtubule clusters in cenexin-depleted cells is likely causing the  
14 significant elevation in microtubule nucleation.

15 We next examined whether two PCM components that are known to form a  
16 complex through direct interaction, Cep215 and pericentrin [6,25], localized with  $\alpha$ -tubulin  
17 at acentrosomal microtubule clusters in cenexin-depleted cells compared to control. To  
18 test for localization of Cep215 and pericentrin with  $\alpha$ -tubulin we calculated a Mander's  
19 overlap coefficient to measure the degree of colocalization (0 to 1, with 1 being perfectly  
20 colocalized) from metaphase cells 5 min post nocodazole washout. In control cells, we  
21 found that Cep215 and pericentrin colocalized with  $\alpha$ -tubulin 5 min post nocodazole  
22 washout (above 0.5 coefficient, Figure S2C-D)). However, with cenexin-loss pericentrin

1 maintained its localization with  $\alpha$ -tubulin, whereas Cep215 did not colocalize to the same  
2 extent (0.41 coefficient, Figure S2C-D). Along these same lines, we find that pericentrin  
3 associates with  $\alpha$ -tubulin clusters/acentrosomal sites in cenexin-depleted cells 5 min post  
4 washout, whereas Cep215 is not present at these sites (Figure 2E). Consistent with this,  
5 cenexin-depleted cells on average have  $5.38 \pm 0.354$  pericentrin clusters compared to  
6  $2.30 \pm 0.122$  Cep215 clusters (Figure 2F-G). This finding suggested that Cep215 and  
7 pericentrin can no longer maintain a stable association with cenexin loss and pericentrin  
8 is associated more so to the acentrosomal microtubule clusters.

9  
10 ***Cenexin and PLK1 work together to maintain proper PCM organization.*** We  
11 examined whether PCM organization is modulated by cenexin through its identified role  
12 as a PLK1 binding partner [12,13]. Specifically, we wanted to examine if cenexin loss  
13 causes changes in active-PLK1 at centrosomes and/or PCM substrate phosphorylation  
14 that associates with PCM fragmentation. To test for PCM substrate phosphorylation we  
15 immunostained for phosphorylated serine/threonine (pS/T) modified proteins in relation  
16 to the PCM using confocal (Figure 3A) or expansion microscopy (ExM, Figure 3D). ExM  
17 is an imaging protocol which provides sub-diffraction limited details of centrosome  
18 organized components [26–28]. Using quantitative confocal microscopy, cenexin-  
19 depleted mitotic cells demonstrated elevated PCM substrate phosphorylation (pS/T)  
20 compared to control conditions (Figure 3A, 3B). The elevated phosphorylation state found  
21 in cenexin-depleted cells was alleviated when cells were treated with a PLK1 small  
22 molecule inhibitor, BI2536 (Figure 3A, 3B), suggesting that elevated pS/T was specific to



1 PLK1. Using ExM, we found that pS/T and Pericentrin modified centrosome substrates  
2 encompassed a significantly larger area in cenexin depleted cells ( $16.68 \pm 4.99 \mu\text{m}^2$  for  
3 pS/T, and  $41.46 \pm 13.64 \mu\text{m}^2$  for Pericentrin) compared to control cells ( $9.72 \pm 3.35 \mu\text{m}^2$  for  
4 pS/T, and  $12.92 \pm 4.17 \mu\text{m}^2$  for Pericentrin, Figure 3D-F). Notably, we identified that  
5 cenexin-depleted cells treated with BI2536, had normal PCM area measured by either  
6 Cep215 in non-ExM cells (Figure S3A-B) or pericentrin in ExM cells (Figure 3D, 3F). ExM  
7 also provided insight that we likely wouldn't obtain from traditional confocal techniques.  
8 By expanding the PCM from approximately  $1.47 \pm 0.07 \mu\text{m}^2$  under control conditions  
9 (Figure S3B) to  $12.92 \pm 0.81 \mu\text{m}^2$  with ExM (Figure 3F), we were able to identify that  
10 pericentrin always occupies a significantly larger area than pS/T both in control  
11 ( $12.92 \pm 4.17 \mu\text{m}^2$  to  $9.72 \pm 3.35 \mu\text{m}^2$ ) and cenexin-depleted cells ( $41.46 \pm 13.64 \mu\text{m}^2$  to  
12  $16.68 \pm 4.99 \mu\text{m}^2$ ), suggesting pS/T substrates have a concentrated distribution towards  
13 the centrosome center in relation to pericentrin (Figure 3D-F, 3G). This tiered organization  
14 is not necessarily perturbed by cenexin-depletion, but cenexin depletion expands PCM  
15 size and pS/T distribution and frequency (Figure 3G). These studies suggest that cenexin-  
16 depleted mitotic cells have fragmented PCM potentially due to elevated PLK1-dependent  
17 phosphorylation events on PCM substrates.

18 We tested if the elevated amounts of pS/T in cenexin-depleted cells resulted from  
19 either too much PLK1 at the centrosome or an overabundance of active PLK1 at the  
20 centrosome by immunostaining for PLK1 (Figure S3A) and active phospho-PLK1(T210)  
21 (Figure 3A) in the presence or absence of the PLK1 small molecule inhibitor (BI2536).  
22 BI2536 treatment resulted in a robust and significant decrease in pPLK1(T210) (Figure

1 3A, 3C) in both control and cenexin-depleted cells, demonstrating that BI2536 was  
2 specifically decreasing PLK1 activity. We identified a slight, but significant decrease in  
3 PLK1-activity (pPLK1(T210) at mitotic centrosomes (Figure 3A, C) compared to total  
4 PLK1 (Figure S3A, C) in cenexin-depleted cells compared to control (Figure 3C). We were  
5 surprised to observe nearly similar levels of active pPLK1(T210) between control and  
6 cenexin-depleted conditions since we saw elevated substrate phosphorylation levels in  
7 cenexin-depleted cells (Figure 3B) and expected to find elevated active pPLK1(T210)  
8 levels. One potential interpretation from our findings is that under cenexin-depleted  
9 conditions a small population of normally cenexin-bound pPLK1(T210) is now free to act  
10 on PCM substrates resulting in PCM fragmentation in cenexin-depleted cells.

11 We addressed if the biophysical state of the PCM was altered with loss of cenexin.  
12 A PCM marker, RFP-pericentrin AKAP450 C-terminal centrosome targeting domain  
13 (PACT), was expressed in control and cenexin-depleted cells treated with and without the  
14 PLK1 inhibitor BI2536 (Figure 3H-I). Using fluorescence recovery after photobleaching  
15 (FRAP) we examined the mobility of RFP-PACT at metaphase centrosomes, where we  
16 found significantly different dynamics between cenexin-depleted cells and control (Figure  
17 3H-I, S3D). Control cells mean mobile fraction ( $0.15 \pm 0.04$ ) was significantly less than the  
18 mobile fraction of cenexin depleted cells ( $0.35 \pm 0.15$ , Figure 3H-I, S3D). This mobility was  
19 partially rescued in cenexin-depleted cells treated with the PLK1 inhibitor BI2536  
20 ( $0.23 \pm 0.12$ , Figure 3H-I, S3D). Together these studies suggest that the increased  
21 substrate phosphorylation through PLK1-cenexin disruption is likely causing increased  
22 PCM mobility. This increase in PCM mobility is suggestive of a model where the packing

1 of Pericentrin is compromised in cenexin-depleted cells that ultimately results in its  
2 fragmentation (Figure 3G).

3

4 ***Cenexin phosphorylation at its conserved C-terminal PLK1 binding site is***  
5 ***required for maintenance of PCM in vivo.*** Human cenexin (Odf2 isoform 9) is unique  
6 from other human Odf2 isoforms in that it bears an N- and C-terminal extension (1-42  
7 amino acid stretch for N-terminus, 701-805 amino acid stretch for C-terminus), with the  
8 PLK1 binding site being situated within the C-terminus [14] (Figure 4A, 4C). Previous  
9 studies identified that human cenexin binds to PLK1 following CDK1 phosphorylation of  
10 S796 [13]. Here, we examined whether human cenexin, and its N- and C-terminal  
11 extensions, are present across phyla by performing BLASTp searches of the human  
12 sequences against 67 proteomes through NCBI's webserver (Figure 4B). Since sequence  
13 hits for several species were not detected on the web server due to insufficient similarity,  
14 we performed BLASTp searches using a local BLAST installation to identify possible  
15 orthologous sequences (Figure S4A). With these studies, we found that cenexin is  
16 present in all vertebrates (chordates) along with two other centrosome proteins tested,  
17 the PLK1 scaffold CEP192 [18], and the centriole protein centrin [29,30]. Cenexin is also  
18 present in hemichordates, mollusks, annelids, rotifers, platyhelminths, and cnidarias, but  
19 absent in arthropods and nematodes, along with ctenophores, poriferas, and placozaa.  
20 The presence of cenexin in each phylum requires the presence of centrioles (ex.  
21 chordates), however the presence of centrioles does not necessarily guarantee that  
22 cenexin is present (ex. nematodes, Figure 4B, S4C). When performing BLASTp searches

1 through the webserver, the C-terminal part of cenexin is conserved in all vertebrates  
2 (chordates, excluding genus pongo, Figure 4B), hemichordates, molluscs, annelids,  
3 rotifers, platyhelminths, and cnidarias, whereas the N-terminus is only present in  
4 chordates (excluding genus pongo, danios, and petromyzon) and hemichordates (Figure  
5 4B). However, using a local BLAST installation pongo and danio was identified with high-  
6 confidence to include both the N- and C-terminus, but oryctolagus along with petromyzon  
7 excludes the N-terminus (Figure S4C). These findings suggest that the C-terminus  
8 containing the PLK1 binding site evolved first and is highly conserved in its function and  
9 potential regulation of the centrosome across phyla. Interestingly, our analyses reveal  
10 that the PLK1 scaffold Cep192 [18,31], is detected in arthropods where the cenexin C-  
11 terminal extension is lacking. Additionally, a Cep192 “like” centrosome protein, spd-2, that  
12 acts as a PLK1 scaffold was identified in *C. elegans* that was not identified by BLASTp  
13 analysis [16]. This suggests that Cep192 may have some redundancy in PLK1 scaffolding  
14 functions allowing cenexin to be potentially dispensable in arthropods and *C. elegans*  
15 (Figure 4B).

16 To determine whether the role cenexin plays in PCM organization is conserved  
17 between human cells and an *in vivo* chordate model identified to have the C-terminal  
18 extension, we aligned the amino acid sequence of human cenexin to zebrafish (*Danio*  
19 *rerio*) cenexin (Figure 4B, 4C). The two sequences shared 50.36% identity with a 70%  
20 positivity rate that accounts for amino acids with functional similarity, suggesting high  
21 conservation between human and zebrafish cenexin. Human cenexin amino acids  
22 spanning the S796 site (781-798) were aligned to zebrafish cenexin where S829

1 corresponded with human S796 (Figure 4C). This provides further support that the C-  
2 terminal tail containing the PLK1 binding site has a conserved function across species.  
3 To test this, we depleted cenexin from zebrafish embryos using previously published  
4 translational morpholinos (MO) to block the translation of cenexin mRNAs [32] and  
5 rescued with human wild-type cenexin (mCherry-cenexin) or cenexin deficient in PLK1  
6 binding (mCherry-cenexin-S796A). mCherry-cenexin displayed a compact ring-like  
7 centriole organization at zebrafish 512-cell stage centrioles comparable to  
8 immunostaining for endogenous cenexin using ExM in human cells (Figure 4C, S4B).  
9 Both mCherry-cenexin and -cenexin-S796A had concentrated organization towards the  
10 centrosome center (Figure 4E) with no significant difference in centrosome area occurring  
11 between the two (Figure S4C). When depleting endogenous zebrafish cenexin,  $\gamma$ -tubulin  
12 became more fragmented and occupied a significantly larger area ( $5.32 \mu\text{m}^2$  in Figure  
13 4D, 4G) compared to control conditions (Figure 4G) or wild-type cenexin (mCherry-  
14 cenexin) rescue conditions ( $3.68 \mu\text{m}^2$  in Figure 4E, 4G). However, mCherry-cenexin-  
15 S796A was unable to rescue centrosome area ( $7.19 \mu\text{m}^2$  in Figure 4E, 4G), suggesting  
16 that the ability of cenexin to bind to PLK1 at S796 is required for its function to modulate  
17 PCM organization.

18         These results prompted us to examine whether PCM substrate phosphorylation  
19 relies on cenexin *in vivo*. To do this, we fixed and immunostained cenexin depleted  
20 embryos rescued with mCherry-cenexin or mCherry-cenexin-S796A for pS/T modified  
21 proteins in relation to the PCM (Figure 4F, 4H). With mCherry-cenexin rescue conditions  
22 pS/T signal was tightly organized ( $0.88 \pm 0.30 \mu\text{m}^2$ , Figure 4F, 4H) occupying a smaller

1 centrosome area than mCherry-cenexin ( $1.36 \pm 0.94 \mu\text{m}^2$ , Figure S4A). Whereas with  
2 mCherry-cenexin-S796A rescues, pS/T signal was mis-organized and dispersed  
3 ( $1.5 \pm 0.71 \mu\text{m}^2$  compared to controls at  $0.88 \pm 0.30 \mu\text{m}^2$ , Figure 4F, 4H). These results are  
4 in agreement with what we found *in vitro* (Figure 3G), where pS/T substrates have a  
5 concentrated distribution towards the centrosome center in relation to the PCM that is  
6 noted by either Pericentrin in human cells (Figure 3D-F, 3G) or  $\gamma$ -tubulin in zebrafish  
7 (Figure 4E-F). This tiered organization is not perturbed by loss of cenexin-PLK1 binding,  
8 but inhibition of this interaction results in expanded pS/T distribution (Figure 4F, 4H).  
9 Altogether, our experiments indicate that the conserved PLK1 binding motif in the C-  
10 terminal tail of cenexin is required for PCM maintenance and function.

11

1 **ACKNOWLEDGEMENTS**

2 This work was supported by National Institutes of Health grants R01GM127621 (H.H.)  
3 and R01GM130874 (H.H.). This work was supported by the U.S Army Medical Research  
4 Acquisition Activity through the FY16 Prostate Cancer Research Programs under Award  
5 no. W81XWH-20-1-0585 (H.H.). Opinions, interpretations, conclusions, and  
6 recommendations are those of the authors and not necessarily endorsed by the  
7 Department of Defense.

8

9 **AUTHOR CONTRIBUTIONS**

10 H.H., A.A.A., A.M., and E.C. designed, performed, and analyzed experiments; H.H. and  
11 A.A.A. wrote manuscript; Y.A.-B. built phylogenetic tree; J.F. and M.B. provided molecular  
12 reagents and zebrafish husbandry. D.M., T.C., and Y.L. performed experiments and  
13 associated analyses. All authors provided edits. H.H. oversaw project.

14

15 **DECLARATION OF INTERESTS**

16 The authors declare no competing interests.

17

18

19

1 **FIGURE TITLES AND LEGENDS**

2

3 **Figure 1. Cenexin loss results in PCM specific fragmentation.** (A) Metaphase HeLa  
4 cells mitotic centrosomes labeled for centrosome markers: centrin, cenexin, Cep192,  
5 Pericentrin, Cep215 and  $\gamma$ -tubulin (Fire LUT) and microtubule marker,  $\alpha$ -tubulin (grey).  
6 Control shRNA (top) and cenexin shRNA (bottom) treated cells shown. Scale bar, 5  $\mu\text{m}$ .  
7 (B-F) Representative scatter plots depicting two-dimensional areas ( $\mu\text{m}^2$ ) of centrin (B),  
8 Cep192 (C), Pericentrin (D), Cep215 (E) and  $\gamma$ -tubulin (F) in control shRNA (grey) and  
9 cenexin shRNA. Mean (magenta) with 95% confidence intervals are displayed. Unpaired,  
10 two-tailed Student's t-tests, n.s. not significant, \*\*\* $p < 0.001$ , \*\*\*\* $p < 0.0001$ . (G) Control  
11 shRNA (top) and cenexin shRNA (bottom) metaphase cell projection. Cells decorated  
12 with centrin (grey), Cep215 (magenta) and DNA (DAPI, cyan). Insets magnified 3x from  
13 G' and G". Scale bar, 5  $\mu\text{m}$ . (H) Model depicting changes in PCM organization resulting  
14 from cenexin-loss. Colors corresponds with mean 2-dimensional areas ( $\mu\text{m}^2$ ) measured  
15  $\pm$ SD. For all graphs: detailed statistical analysis in Table S1. See also Figure S1.

16

17 **Figure 2. Cenexin tempers microtubule nucleation by mediating pericentrin**  
18 **associated acentrosomal nucleation sites.** (A) Model of microtubule renucleation  
19 assay in metaphase cells. (B) Control and cenexin shRNA treated HeLa cells are  
20 incubated with nocodazole then washed with fresh media (washout). At 0 min, 5 min and  
21 20 min post washout, cells are fixed and immunostained for  $\alpha$ -tubulin (Fire LUT). Scale  
22 bar, 10  $\mu\text{m}$ . (C-D) Scatter plot depicting  $\alpha$ -tubulin intensity at metaphase centrosomes



1 (C) or the number of  $\alpha$ -tubulin clusters (D) 5-min post nocodazole washout in control  
2 shRNA (grey) and cenexin shRNA (cyan). Mean (magenta) with 95% confidence intervals  
3 are displayed. Unpaired, two-tailed Student's t-tests, \*\*\*\* $p < 0.0001$ . (E)  $\alpha$ -tubulin (grey,  
4 cyan in merge), pericentrin (gray; magenta in merge) and CEP215 (gray; magenta in  
5 merge) metaphase cell projections in control shRNA or cenexin shRNA at 5-min post  
6 nocodazole washout. Scale bar, 10  $\mu\text{m}$ . (F-G) Scatter plot depicting the number of  
7 pericentrin clusters (F) and CEP215 clusters (G) 5-min post nocodazole washout in  
8 control shRNA and cenexin shRNA cells. Mean (magenta) with 95% confidence intervals  
9 are displayed. Unpaired, two-tailed Student's t-tests, \*\*\*\* $p < 0.0001$ , n.s. not significant.  
10 For all graphs: detailed statistical analysis in Table S1. See also Figure S2.

11

12 **Figure 3. Cenexin and PLK1 work together to maintain proper PCM organization.**

13 (A) Control shRNA or cenexin shRNAs metaphase cells with or without BI2536 were  
14 immunolabeled for phospho-serine/threonine (pS/T, top) and phospho-PLK1(T210)  
15 (pPLK1, bottom) (FireLUT). Scale bar, 5 $\mu\text{m}$ . (B-C) Representative scatter plots depicting  
16 pS/T (B) or pPLK1 intensity (D) at metaphase centrosomes. Mean (magenta) with 95%  
17 confidence intervals are displayed. One-way ANOVA with multiple comparisons to control  
18 cells, \*\*\*\* $p < 0.0001$ . (D) Expansion microscopy of control and cenexin shRNA metaphase  
19 cell centrosomes with or without BI2536. Centrosomes immunolabeled for pS/T (inverted  
20 grey, top) or Pericentrin (inverted grey, bottom). Scale bar, 5 $\mu\text{m}$ . (E-F) Representative  
21 scatter plots depicting expanded two-dimensional areas ( $\mu\text{m}^2$ ) of pS/T (E) or Pericentrin  
22 (F) in control shRNA and cenexin shRNA metaphase cells with or without BI2536. Mean

1 (magenta) with 95% confidence intervals are displayed. One-way ANOVA with multiple  
2 comparisons to control cells, n.s. not significant, \*\* $p < .01$ , \*\*\*\* $p < 0.0001$ . (G) Model  
3 depicting relative changes in pS/T and Pericentrin organization with cenexin depletion  
4 and cenexin depletion coupled with PLK1 inhibition. (H) FRAP examples of control and  
5 cenexin shRNA metaphase cell centrosomes. Magnified insets of boxed centrosomes  
6 depict examples of pre-bleach, bleach, 3.4s post-bleach and 5.1s post-bleach conditions  
7 in control and cenexin shRNA cells. Cyan circles represent region to which 405nm laser  
8 was applied for photo-bleaching. Scale bar, 5  $\mu\text{m}$ . (I) FRAP curves displaying changes in  
9 normalized RFP-PACT signal overtime (s) in metaphase control (black), cenexin shRNA  
10 (cyan) and cenexin shRNA with BI2536 cells (blue). SEM shown. For all graphs: detailed  
11 statistical analysis in Table S1. See also Figure S3.

12

13 **Figure 4. Cenexin phosphorylation at its conserved C-terminal PLK1 binding site**  
14 **is required for maintenance of PCM *in vivo*.** (A) Schematic representation of human  
15 hODF2 and cenexin (Cnxn, ODF2 isoform 9). The blue and magenta boxes highlight the  
16 N- and C-terminal extensions unique to cenexin. (B) Phylogenetic tree of the evolution of  
17 cenexin and its N-terminus and C-terminus in relation to Cep192 and centrin across  
18 different animal phyla. Cyan and orange boxes indicate whether cenexin and centrosome  
19 components (Cep192 and centrin) are detected or not detected within representative  
20 species of each phylum. Dark blue boxes highlight two species (humans and zebrafish).  
21 (C) Amino acid alignment between human and zebrafish cenexin C-terminal PLK1 binding  
22 motif. The serine highlighted in magenta represents the known human cenexin-PLK1 site

1 (S796) and potential zebrafish binding site (S829). Letters in the middle between two  
2 sequences represent identical amino acids, and the + sign represent an amino acid of  
3 functional identity. Representative confocal maximum projection of cenexin from  
4 expanded (ExM) human cells and from a zebrafish embryo cell shown. Scale bar 0.05  
5  $\mu\text{m}$ . (D-F) Representative cells from 512-cell zebrafish embryos under cenexin depletion  
6 conditions (Cenexin MO, D), or rescue conditions (cenexin MO plus mCh-cenexin or  
7 mCh-cenexin-S796A, magenta in E-F) fixed and immunostained for  $\gamma$ -tubulin (inverted  
8 grey, D-E) or pST (inverted grey, F). Insets (D', E', E'', F', and F'') at 5x magnification,  
9 corresponding areas outlined ( $\mu\text{m}^2$ ). Scale bar, 5 $\mu\text{m}$ . (G) Scatter plot depicting  $\gamma$ -tubulin  
10 area ( $\mu\text{m}^2$ ) at mitotic centrosomes under control, cenexin MO, and rescue conditions  
11 (cenexin MO plus mCh-cenexin or mCh-cenexin-S796A). Mean (magenta) with 95%  
12 confidence intervals shown. One-way ANOVA with multiple comparisons to control cells,  
13 n.s. not significant, \*\* $p < .01$ , \*\*\*\* $p < 0.0001$ . (H) Scatter plot depicting pS/T area ( $\mu\text{m}^2$ ) at  
14 mitotic centrosomes under rescue conditions (cenexin MO plus mCh-cenexin or mCh-  
15 cenexin-S796A). Unpaired, two-tailed Student's t-tests, \*\*\*\* $p < 0.0001$ . For all graphs:  
16 detailed statistical analysis in Table S1. See also Figure S4.

17

1

2 **METHODS:**

3

4 **RESOURCE AVAILABILITY**

5

6 **Lead Contact.** For further information or to request resources/reagents, contact the  
7 Lead Contact, Heidi Hehnly ([hhehnly@syr.edu](mailto:hhehnly@syr.edu)).

8

9 **Materials Availability.** No new materials were generated for this study.

10

11 **Data and Code Availability.** All data sets analyzed for this study are displayed. A  
12 supplemental CSV file is provided with the species used in the phylogenetic analysis with  
13 a FTP link to download their proteomes (supplemental file SF1A,  
14 Metazoan\_taxon\_list\_FTP\_links.csv), the tree file is provided in Newick format (File  
15 SF1B, nuclear\_genes\_tree.nwk), the R script file for phylogeny analysis is available as a  
16 supplemental file SF1 (File SF1C, phylo\_analysis.html), and the BLAST results are  
17 provided in a supplement table formatted in supplemental file SF1 (File SF1D,  
18 NCBI\_BLAST\_results.zip; File SF1E, Homebrew\_BLAST\_results.zip).

19

20

## 1    **EXPERIMENTAL MODEL AND SUBJECT DETAILS**

2

### 3    **Zebrafish**

4    All zebrafish lines were maintained using standard procedures approved by the Syracuse  
5    University IACUC committee (protocol #18-006). For details see [10,33]. See Key  
6    Resources Table for list of zebrafish transgenic lines used.

7

### 8    **Cell Culture**

9    HeLa cells treated with either control or cenexin shRNA [22] were used throughout this  
10    study. Cells were selected in puromycin (3µg/mL). See Key Resources Table for list of  
11    cell lines used.

12

## 13    **METHOD DETAILS**

### 14    **Immunofluorescence**

15    Cells were plated on #1.5 coverslips until they reached 90% confluence and fixed using  
16    ice cold methanol for 10 min. Standard immunostaining procedures were performed  
17    (described in [34]). Coverslips were rinsed with diH<sub>2</sub>O and mounted on glass slides using  
18    ProLong Gold mounting media (Thermo Fisher Scientific; P36934). Zebrafish embryos  
19    were fixed using 4% PFA at 4°C overnight, for immunostaining see [10,33]. See Key  
20    Resources Table for list of antibodies used in this study.

21

## 1 **Chemical Inhibitors**

2 Chemical inhibitors include nocodazole used on cells at 100 nM or 10 $\mu$ m, ProTAME  
3 (Fisher; I44001M) used on cells at 10  $\mu$ M, and BI2536 used on cells at 100 nM. See Key  
4 Resources Table for more information on inhibitors used in this study.

5

## 6 **Morpholino Injections**

7 Anti-cenexin vivo translational morpholinos (Gene Tools; [32]) or vivo standard control  
8 morpholinos (Gene Tools) were constituted as 1mM stock in water and injected into  
9 zebrafish yolks at 1 cell stage in a final concentration of 2ng/nL. Injection protocols  
10 detailed in [33].

## 11 **Plasmid Constructs and mRNA**

12 Gibson cloning methods were used to generate mCherry-cenexin-WT and mCherry-  
13 cenexin-S796A plasmids (NEBuilder HiFi DNA assembly kit), then purified using DNA  
14 maxi-prep kit (Bio Basic; 9K-006-0023). mRNA was generated from plasmids using  
15 mMESAGE mMACHINE™SP6 transcription kit (Thermo Fisher Scientific; AM1340).

16

## 17 **Fluorescence Recovery After Photobleaching (FRAP)**

18 FRAP experiments were performed using a Leica DMI8 STP800 spinning disk confocal  
19 microscope using a 40x/1.10 NA water immersion objective. A Region of Interest (ROI)  
20 was placed over one of the spindle poles, where a 405nm laser was applied. RFP-PACT  
21 fluorescence was bleached within the ROI after administration of the laser. Fluorescence

1 recovery time as well as signal intensity were measured every 100 ms to determine the  
2 mobile fraction.

3

#### 4 **Microtubule Renucleation Assay**

5 HeLa cells were treated with 1  $\mu$ M nocodazole in media for 30 minutes. Cells were  
6 washed twenty times with 1xPBS and placed in media at 37 °C for 0s, 30s, 1m, 2m, 5m  
7 or 20m. Cells were fixed using methanol overnight at -20 °C. Cells were immunostained  
8 and then imaged for analysis.

9

#### 10 **Expansion Microscopy**

11 Protocol used was modified from previously published expansion protocols [26,35].  
12 Modified protocol is described below. See Key Resources Table for chemicals used.

13 *Cell preparation.* HeLa cells were grown on glass coverslips and synchronized with  
14 10  $\mu$ M protame for 1 hour, then fixed with ice cold methanol for 10 minutes or 4% PFA in  
15 1 X PBS for 1 hour at 22-25 °C.

16 *Immunostaining and acrylamide incubation.* Cells were blocked in PBS $\Delta$ T for 1  
17 hour at 22-25 °C if methanol fixed or in 0.1% Triton X-100 with 5% donkey serum in 1x  
18 PBS for 15 minutes at 22-25 °C if PFA fixed. Cells were then incubated with primary  
19 antibodies in blocking buffer overnight at 4 °C then with secondary antibodies for 4 hours  
20 at 22-25 °C. Cells were incubated in 30% acrylamide solution in 1xPBS overnight at 40  
21 °C.

1            *Gelation, cell punching, and digestion.* Following three 10-minute 1 X PBS washes  
2 (PFA fixed) or 10x PBS $\Delta$ T washes (if methanol fixed), the slides (cell side up) and the  
3 parafilm-covered Petri dish were placed on an ice bath. Gelation reagents were placed  
4 on the coverslips in chilled 1 X PBS: 20% acrylamide, 7% sodium acrylate, and 0.04%  
5 bisacrylamide, with APS and TEMED added just before application. Gelation solution was  
6 added to each coverslip, incubated for 20 minutes on ice, and then incubated at 30°C for  
7 1.5 hours. A 4 mm biopsy punch was utilized to excise punches from gelled samples.  
8 Punches were incubated with digestion buffer (Triton-X + EDTA + Tris pH8 + NaCl in  
9 water) overnight at 22-25 °C in the dark.

10           *Post expansion staining to enhance fluorescence.* Cell punches were washed and  
11 blocked with appropriate buffer then incubated with primary antibodies followed by  
12 secondary antibodies in blocking buffer for 4 hours at 22-25 °C.

13           *Expansion and mounting.* After digestion, samples were expanded in dH<sub>2</sub>O for 2  
14 hours at 22-25 °C with dH<sub>2</sub>O exchange every 20 minutes. Samples were left in dH<sub>2</sub>O  
15 and DABCO overnight to expand and protect IF signal. Samples were mounted in MatTek  
16 plate the following day for imaging.

17

## 18 **Imaging**

19 Tissue culture cells and zebrafish embryos were imaged using a Leica DMI8 STP800  
20 (Leica, Bannockburn, IL) equipped with X-light V2 Confocal Unit spinning disk and an 89  
21 North-LDI laser launch with a Photometrics Prime-95B camera or a Leica SP8 Laser  
22 Scanning Confocal Microscope (LSCM; Leica, Bannockburn, IL). Optics used on Leica



1 DMI8 were HC PL APO 63x/1.40 NA oil CS2 or HC PL APO 40x/1.10 NA CORR WCS2  
2 water. The optics used on the SP8 LSCM is HC PL APO 40x/1.10NA CORR CS2 0.65  
3 water objective or HC PL APO 63x/1.30 NA Glyc CORR CS2 glycerol objective. Visiview  
4 software (Lecia DMI8) or LasX (SP8 LSCM) were used to acquire images.

5 For live Zebrafish imaging, fluorescent transgenic or mRNA injected embryos  
6 (injection protocols in [33]) were mounted in 2% low melting agarose gel (Thermo Fisher  
7 Scientific; 16520100) at 512-cell stage and imaged using SP8 LSCM or spinning disk  
8 confocal microscopes.

9

## 10 **Image and Statistical Analysis**

11 Images were processed using FIJI/ImageJ software. All analysis was performed on  
12 maximum projections unless otherwise stated. Spindle pole area was measured using  
13 the freehand selection tool to draw a boundary of the poles and calculating the area within  
14 shape [33]. Signal intensities were measured by placing a ROI over site of interest (poles  
15 or clusters). Signal intensity was calculated by subtracting the minimum intensity from the  
16 mean intensity of measured region, unless otherwise noted. All figures were created in  
17 Adobe Illustrator, and graphs were created using Graphpad Prism software. Statistical  
18 analyses (unpaired Student's t tests and analysis of variance ANOVA) were performed  
19 using Graphpad Prism. \*\*P<0.01, \*\*\*P<0.001, and \*\*\*\*P<0.0001.

20

## 1 **Phylogenetic Analysis of Cenexin**

2 To analyze the pattern of evolutionary conservation of Cenexin (Cnxxn, Odf2 isoform 9)  
3 among metazoan phyla, a metazoan phylogeny was built using a single protein isoform  
4 (isoform 1) of three nuclear genes (*SMCA1A*, *SMC1B*, and *MCM5*) for 67 species that  
5 represent the major metazoan phyla and for which annotated proteomes are available on  
6 NCBI (supplemental files SF1A-B). *Saccharomyces cerevisiae* and *Neurospora crassa*  
7 were used as outgroups. The three protein sequences were first extracted from the *Homo*  
8 *sapiens* proteome and orthologs in the remaining species were identified using BLASTp  
9 [36]. A multiple sequence alignment of the three proteins was constructed using Muscle  
10 [37], and individual alignments were subsequently concatenated. A maximum likelihood  
11 phylogenetic tree was built with PhyML using default parameters [38]. To identify  
12 orthologs of Cenexin and its N- and C- termini, we first performed BLASTp searches of  
13 the human sequences against the 67 proteomes on the NCBI web server. Sequence hits  
14 for several species were not detected on the web server due to insufficient similarity,  
15 therefore we performed BLASTp searches using a local BLAST installation to identify  
16 possible orthologous sequences. Because we obtained a BLASTp hit for each species,  
17 we classified hit confidence as potential orthologs based on hit length, percent identity,  
18 and NCBI annotation. Specifically, we considered a hit a “high confidence” ortholog if the  
19 protein was annotated by NCBI as an Odf2 ortholog or had a matched alignment length  
20 >100 a.a. (Cnxxn), >80 a.a. (C-terminus), or >30 a.a. (N-terminus) and a percent identity  
21 >60% (Cnxxn) or >40% (C-terminus and N-terminus). Alternatively, we considered a hit a  
22 “medium confidence” ortholog if the matched alignment length was between 30 a.a. and

1 100 a.a. (Cnxx), 30 a.a. and 80 a.a. (C-terminus), or 40 a.a. and 30 a.a. and a percent  
2 identity >40%. Finally, alignment matches that were shorter than 30 a.a. (Cnxx and C-  
3 terminus) or 15 a.a. (N-terminus) and percent identity <40% were considered “low  
4 confidence” hits. Any hit that did not match our criteria was considered an “unlikely  
5 ortholog”. All phylogenetic analyses were performed on R primarily using the ggtree  
6 package [39]. The phylogenetic analysis script and input files is available in supplemental  
7 files SF1C-E.  
8

## 1 KEY RESOURCES TABLE

| REAGENT or RESOURCE                                  | SOURCE                    | IDENTIFIER                       |
|------------------------------------------------------|---------------------------|----------------------------------|
| <b>Antibodies</b>                                    |                           |                                  |
| α-Tubulin-AF555 (mouse)                              | EMD Millipore             | Cat# 05-829-AF555                |
| CDK5RAP2/Cep215 (rabbit)                             | Bethyl laboratories       | Cat# IHC-00063, RRID: AB_2076863 |
| Cep192 (rabbit)                                      | Bethyl laboratories       | Cat# A302-324A,                  |
| Centrin (mouse)                                      | EMD Millipore             | Cat# 04-1624, RRID: AB_10563501  |
| DAPI                                                 | SigmaAldrich              | Cat# D9542-10MG                  |
| Donkey anti-mouse AF647                              | Fisher Scientific         | Cat# A31571, AB_162542           |
| Donkey anti-rabbit AF 488                            | Life Technologies         | Cat# A21206, RRID: AB_2535792    |
| Donkey anti-rabbit AF 568                            | Life Technologies         | Cat# A10042, AB_2534017          |
| Donkey anti-rabbit AF 647                            | Life Technologies         | Cat# A31573, RRID: AB_2536183    |
| Gamma-tubulin (mouse)                                | Abcam Biochemicals        | Cat# 11316, RRID: AB_297920      |
| Gamma-tubulin (rabbit)                               | Sigma Aldrich             | Cat# T5192, RRID: AB_261690      |
| Pericentrin (rabbit)                                 | Abcam Biochemicals        | Cat# ab4448 AB_304461            |
| PLK1 (rabbit)                                        | Cell Signaling Technology | Cat# 4513S, RRID: AB_2167409     |
| Phospho-PLK1 (Thr210) (rabbit)                       | Cell Signaling Technology | Cat# 5472, RRID: AB_10698594     |
| Phospho-(Ser/Thr) (rabbit)                           | Cell Signaling Technology | Cat# 9631, RRID: AB_330308       |
| ODF2/Cenexin (rabbit)                                | Thomas Scientific         | Cat# 12058-1-AP                  |
| <b>Chemicals, Peptides, and Recombinant Proteins</b> |                           |                                  |
| Acrylamide solution, 40%                             | Sigma Aldrich             | Cat# A4058-100ML                 |
| Acrylamide-Bisacrylamide solution                    | EMD Millipore             | Cat# 1300-500ML                  |
| Agarose                                              | Thermo-Fisher             | Cat# 16520100                    |
| APS (Ammonium Presulfate)                            | Fisher Bioreagents        | Cat# BP179-100                   |
| BI2536                                               | Selleck Chemicals         | Cat# S1109                       |
| Bovine serum albumin                                 | Fisher Scientific         | Cat# BP1600-100                  |
| Dimethylsulfoxide                                    | Fisher Scientific         | Cat# BP231100                    |
| DABCO (1,4-Diazabicyclo [2.2.2] octane, 97%)         | Fisher Scientific         | Cat# AC112470250                 |
| EDTA                                                 | Fisher Scientific         | Cat# BP120-500                   |
| NaCl                                                 | Fisher Bioreagents        | Cat# BP358-212                   |
| Nocodazole                                           | Fisher Scientific         | Cat# AC358240500                 |
| Paraformaldehyde                                     | Fisher Scientific         | Cat# AA433689M                   |
| Phosphate-buffered saline                            | Fisher Scientific         | Cat# 10010023                    |
| Prolong Gold                                         | Invitrogen                | Cat# P36934                      |
| Sodium acrylate, 97%                                 | Sigma Aldrich             | Cat# 408220-25G                  |
| ProTame                                              | R&D Systems               | Cat# I-440-01M                   |
| TEMED                                                | Fisher Scientific         | Cat# BP150-100                   |
| Tris base                                            | Fisher Bioreagents        | Cat# BP152-5                     |
| Triton x-100                                         | Fisher Scientific         | Cat# BP151500                    |
| Tween 20                                             | Thermo-Fisher             | Cat# BP337500                    |

| <b>Experimental Models: Organisms/Strains</b> |                                                                |                                                                                                                                                                                   |
|-----------------------------------------------|----------------------------------------------------------------|-----------------------------------------------------------------------------------------------------------------------------------------------------------------------------------|
| Human HeLa Cells control shRNA                | [20]                                                           | N/A                                                                                                                                                                               |
| Human HeLa Cells cexxin shRNA                 | [20]                                                           | N/A                                                                                                                                                                               |
| Zebrafish                                     | Zebrafish International Resource Center (ZIRC)                 | TAB (wild-type)                                                                                                                                                                   |
| Zebrafish                                     | Gift from Solnica-Krezel Lab, generated by Harris Lab          | Tg(-5actb2:cetn4-GFP)                                                                                                                                                             |
| <b>Software and Algorithms</b>                |                                                                |                                                                                                                                                                                   |
| Adobe Illustrator                             |                                                                |                                                                                                                                                                                   |
| ImageJ/FIJI                                   | Schindelin, J.; Arganda-Carreras, I. & Frise, E. et al. (2012) | <a href="https://imagej.net/Fiji">https://imagej.net/Fiji</a>                                                                                                                     |
| Prism8                                        | GraphPad                                                       | <a href="https://www.graphpad.com/scientific-software/prism/">https://www.graphpad.com/scientific-software/prism/</a>                                                             |
| LAS-X software                                | Leica Microsystems                                             | <a href="https://www.leica-microsystems.com/products/microscope-software/p/leica-las-x-ls/">https://www.leica-microsystems.com/products/microscope-software/p/leica-las-x-ls/</a> |
| R version 4.1.2; package ggtree               | The R project for Statistical Computing                        | <a href="https://www.r-project.org">https://www.r-project.org</a>                                                                                                                 |

1  
2  
3

1  
2  
3

## REFERENCES:

- 4 1. Vertii, A., Hehnly, H., and Doxsey, S. (2016). The centrosome, a multitasking  
5 renaissance organelle. *Cold Spring Harb. Perspect. Biol.* 8.
- 6 2. Mennella, V., Agard, D.A., Huang, B., and Pelletier, L. (2014). Amorphous no  
7 more: subdiffraction view of the pericentriolar material architecture. *Trends Cell*  
8 *Biol.* 24, 188–197.
- 9 3. Colicino, E.G., and Hehnly, H. (2018). Regulating a key mitotic regulator, polo-like  
10 kinase 1 (PLK1). *Cytoskeleton* 75, 481–494.
- 11 4. Ohta, M., Zhao, Z., Wu, D., Wang, S., Harrison, J.L., Gómez-Cavazos, J.S.,  
12 Desai, A., and Oegema, K.F. (2021). Polo-like kinase 1 independently controls  
13 microtubule-nucleating capacity and size of the centrosome. *J. Cell Biol.* 220.
- 14 5. Wueseke, O., Zwicker, D., Schwager, A., Wong, Y.L., Oegema, K., Jülicher, F.,  
15 Hyman, A.A., and Woodruff, J.B. (2016). Polo-like kinase phosphorylation  
16 determines *Caenorhabditis elegans* centrosome size and density by biasing SPD-  
17 5 toward an assembly-competent conformation. *Biol. Open* 5, 1431–1440.
- 18 6. Lee, K., and Rhee, K. (2011). PLK1 phosphorylation of pericentrin initiates  
19 centrosome maturation at the onset of mitosis. *J. Cell Biol.* 195, 1093–1101.
- 20 7. Mittasch, M., Tran, V.M., Rios, M.U., Fritsch, A.W., Enos, S.J., Gomes, B.F.,  
21 Bond, A., Kreysing, M., and Woodruff, J.B. (2020). Regulated changes in material  
22 properties underlie centrosome disassembly during mitotic exit. *J. Cell Biol.* 219.
- 23 8. Cabral, G., Laos, T., Dumont, J., and Dammermann, A. (2019). Differential  
24 Requirements for Centrioles in Mitotic Centrosome Growth and Maintenance.  
25 *Dev. Cell* 50, 355-366.e6.
- 26 9. Sepulveda, G., Antkowiak, M., Brust-Mascher, I., Mahe, K., Ou, T., Castro, N.M.,  
27 Christensen, L.N., Cheung, L., Jiang, X., Yoon, D., et al. (2018). Co-translational  
28 protein targeting facilitates centrosomal recruitment of PCNT during centrosome  
29 maturation in vertebrates. *Elife* 7.
- 30 10. Rathbun, L.I., Aljiboury, A.A., Bai, X., Hall, N.A., Manikas, J., Amack, J.D.,

- 1 Bembenek, J.N., and Hehnlly, H. (2020). PLK1- and PLK4-Mediated Asymmetric  
2 Mitotic Centrosome Size and Positioning in the Early Zebrafish Embryo. *Curr.*  
3 *Biol.* *30*, 4519-4527.e3.
- 4 11. Gomez-Ferreria, M.A., Rath, U., Buster, D.W., Chanda, S.K., Caldwell, J.S.,  
5 Rines, D.R., and Sharp, D.J. (2007). Human Cep192 Is Required for Mitotic  
6 Centrosome and Spindle Assembly. *Curr. Biol.* *17*, 1960–1966.
- 7 12. Soung, N.-K., Kang, Y.H., Kim, K., Kamijo, K., Yoon, H., Seong, Y.-S., Kuo, Y.-L.,  
8 Miki, T., Kim, S.R., Kuriyama, R., et al. (2006). Requirement of hCenexin for  
9 Proper Mitotic Functions of Polo-Like Kinase 1 at the Centrosomes. *Mol. Cell.*  
10 *Biol.* *26*, 8316–8335.
- 11 13. Soung, N.K., Park, J.E., Yu, L.R., Lee, K.H., Lee, J.M., Bang, J.K., Veenstra, T.D.,  
12 Rhee, K., and Lee, K.S. (2009). Plk1-Dependent and -Independent Roles of an  
13 ODF2 Splice Variant, hCenexin1, at the Centrosome of Somatic Cells. *Dev. Cell*  
14 *16*, 539–550.
- 15 14. Chang, J., Seo, S.G., Lee, K.H., Nagashima, K., Bang, J.K., Kim, B.Y., Erikson,  
16 R.L., Lee, K.W., Lee, H.J., Park, J.E., et al. (2013). Essential role of Cenexin1, but  
17 not Odf2, in ciliogenesis. <http://dx.doi.org/10.4161/cc.23585> *12*, 655–662.
- 18 15. Meng, L., Park, J.-E., Kim, T.-S., Lee, E.H., Park, S.-Y., Zhou, M., Bang, J.K., and  
19 Lee, K.S. (2015). Bimodal Interaction of Mammalian Polo-Like Kinase 1 and a  
20 Centrosomal Scaffold, Cep192, in the Regulation of Bipolar Spindle Formation.  
21 *Mol. Cell. Biol.* *35*, 2626–2640.
- 22 16. Kemp, C.A., Kopish, K.R., Zipperlen, P., Ahringer, J., and O’Connell, K.F. (2004).  
23 Centrosome Maturation and Duplication in *C. elegans* Require the Coiled-Coil  
24 Protein SPD-2. *Dev. Cell* *6*, 511–523.
- 25 17. Conduit, P.T., Richens, J.H., Wainman, A., Holder, J., Vicente, C.C., Pratt, M.B.,  
26 Dix, C.I., Novak, Z.A., Dobbie, I.M., Schermelleh, L., et al. (2014). A molecular  
27 mechanism of mitotic centrosome assembly in *Drosophila*. *Elife* *3*, 1–23.
- 28 18. Joukov, V., Walter, J.C., and De Nicolo, A. (2014). The Cep192-Organized Aurora  
29 A-Plk1 Cascade Is Essential for Centrosome Cycle and Bipolar Spindle  
30 Assembly. *Mol. Cell* *55*, 578–591.

- 1 19. Colicino, E.G., Stevens, K., Curtis, E., Rathbun, L., Bates, M., Manikas, J.,  
2 Amack, J.J., Freshour, J., and Hehnly, H. (2019). Chromosome misalignment is  
3 associated with PLK1 activity at cenexin-positive mitotic centrosomes. *Mol. Biol.*  
4 *Cell* *30*, 1598–1609.
- 5 20. Ishikawa, H., Kubo, A., Tsukita, S., and Tsukita, S. (2005). Odf2-deficient mother  
6 centrioles lack distal/subdistal appendages and the ability to generate primary  
7 cilia. *Nat. Cell Biol.* *7*, 517–524.
- 8 21. Tateishi, K., Yamazaki, Y., Nishida, T., Watanabe, S., Kunimoto, K., Ishikawa, H.,  
9 and Tsukita, S. (2013). Two appendages homologous between basal bodies and  
10 centrioles are formed using distinct Odf2 domains. *J. Cell Biol.* *203*, 417–425.
- 11 22. Hung, H.F., Hehnly, H., and Doxsey, S. (2016). The mother centriole appendage  
12 protein cenexin modulates lumen formation through spindle orientation. *Curr. Biol.*  
13 *26*, 793–801.
- 14 23. Rusan, N.M., Serdar Tulu, U., Fagerstrom, C., and Wadsworth, P. (2002).  
15 Reorganization of the microtubule array in prophase/prometaphase requires  
16 cytoplasmic dynein-dependent microtubule transport. *J. Cell Biol.* *158*, 997–1003.
- 17 24. Tulu, U.S., Rusan, N.M., and Wadsworth, P. (2003). Peripheral, Non-  
18 Centrosome-Associated Microtubules Contribute to Spindle Formation in  
19 Centrosome-Containing Cells. *Curr. Biol.* *13*, 1894–1899.
- 20 25. Chen, C.T., Hehnly, H., Yu, Q., Farkas, D., Zheng, G., Redick, S.D., Hung, H.F.,  
21 Samtani, R., Jurczyk, A., Akbarian, S., et al. (2014). A Unique Set of Centrosome  
22 Proteins Requires Pericentrin for Spindle-Pole Localization and Spindle  
23 Orientation. *24*, 2327–2334.
- 24 26. Sahabandu, N., Kong, D., Magidson, V., Nanjundappa, R., Sullenberger, C.,  
25 Mahjoub, M.R., and Loncarek, J. (2019). Expansion microscopy for the analysis of  
26 centrioles and cilia. *J. Microsc.* *276*, 145–159.
- 27 27. Chozinski, T.J., Halpern, A.R., Okawa, H., Kim, H.-J., Tremel, G.J., Wong, R.O.L.,  
28 and Vaughan, J.C. (2016). Expansion microscopy with conventional antibodies  
29 and fluorescent proteins. *Nat. Methods* *2016* *13*, 485–488.
- 30 28. Asano, S.M., Gao, R., Wassie, A.T., Tillberg, P.W., Chen, F., and Boyden, E.S.



- 1 (2018). Expansion Microscopy: Protocols for Imaging Proteins and RNA in Cells  
2 and Tissues. *Curr. Protoc. Cell Biol.* *80*, e56.
- 3 29. Levy, Y.Y., Lai, E.Y., Remillard, S.P., Heintzelman, M.B., and Fulton, C. (1996).  
4 Centrin Is a Conserved Protein That Forms Diverse Associations With Centrioles  
5 and MTOCs in *Naegleria* and Other Organisms. *Cell Motil. Cytoskeleton* *33*, 298–  
6 323.
- 7 30. Salisbury, J.L., Suino, K.M., Busby, R., and Springett, M. (2002). Centrin-2 Is  
8 Required for Centriole Duplication in Mammalian Cells. *Curr. Biol.* *12*, 1287–1292.
- 9 31. Wong, S.-S., Wilmott, Z.M., Saurya, S., Zhou, F.Y., Chau, K.-Y., Goriely, A., and  
10 Raff, J.W. (2021). Mother centrioles generate a local pulse of Polo/PLK1 activity  
11 to initiate mitotic centrosome assembly. *bioRxiv*, 2021.10.26.465695.
- 12 32. Novorol, C., Burkhardt, J., Wood, K.J., Iqbal, A., Roque, C., Coutts, N., Almeida,  
13 A.D., He, J., Wilkinson, C.J., and Harris, W.A. (2013). Microcephaly models in the  
14 developing zebrafish retinal neuroepithelium point to an underlying defect in  
15 metaphase progression. *Open Biol.* *3*, 130065.
- 16 33. Aljiboury, A.A., Mujcic, A., Cammerino, T., Rathbun, L.I., and Hehnly, H. (2021).  
17 Imaging the early zebrafish embryo centrosomes following injection of small-  
18 molecule inhibitors to understand spindle formation. *STAR Protoc.* *2*, 100293.
- 19 34. Colicino, E.G., Garrastegui, A.M., Freshour, J., Santra, P., Post, D.E., Kotula, L.,  
20 and Hehnly, H. (2018). Gravin regulates centrosome function through PLK1. *Mol.*  
21 *Biol. Cell* *29*.
- 22 35. Chozinski, T.J., Halpern, A.R., Okawa, H., Kim, H.J., Tremel, G.J., Wong, R.O.L.,  
23 and Vaughan, J.C. (2016). Expansion microscopy with conventional antibodies  
24 and fluorescent proteins. *Nat. Methods* *13*, 485–488.
- 25 36. Altschul, S.F., Gish, W., Miller, W., Myers, E.W., and Lipman, D.J. (1990). Basic  
26 local alignment search tool. *J. Mol. Biol.* *215*, 403–410.
- 27 37. Edgar, R.C. (2004). MUSCLE: multiple sequence alignment with high accuracy  
28 and high throughput. *Nucleic Acids Res.* *32*, 1792–1797.
- 29 38. Guindon, S., Dufayard, J.F., Lefort, V., Anisimova, M., Hordijk, W., and Gascuel,  
30 O. (2010). New Algorithms and Methods to Estimate Maximum-Likelihood

- 1 Phylogenies: Assessing the Performance of PhyML 3.0. *Syst. Biol.* *59*, 307–321.
- 2 39. Yu, G., Smith, D.K., Zhu, H., Guan, Y., and Lam, T.T.Y. (2017). ggtree: an r
- 3 package for visualization and annotation of phylogenetic trees with their
- 4 covariates and other associated data. *Methods Ecol. Evol.* *8*, 28–36.
- 5

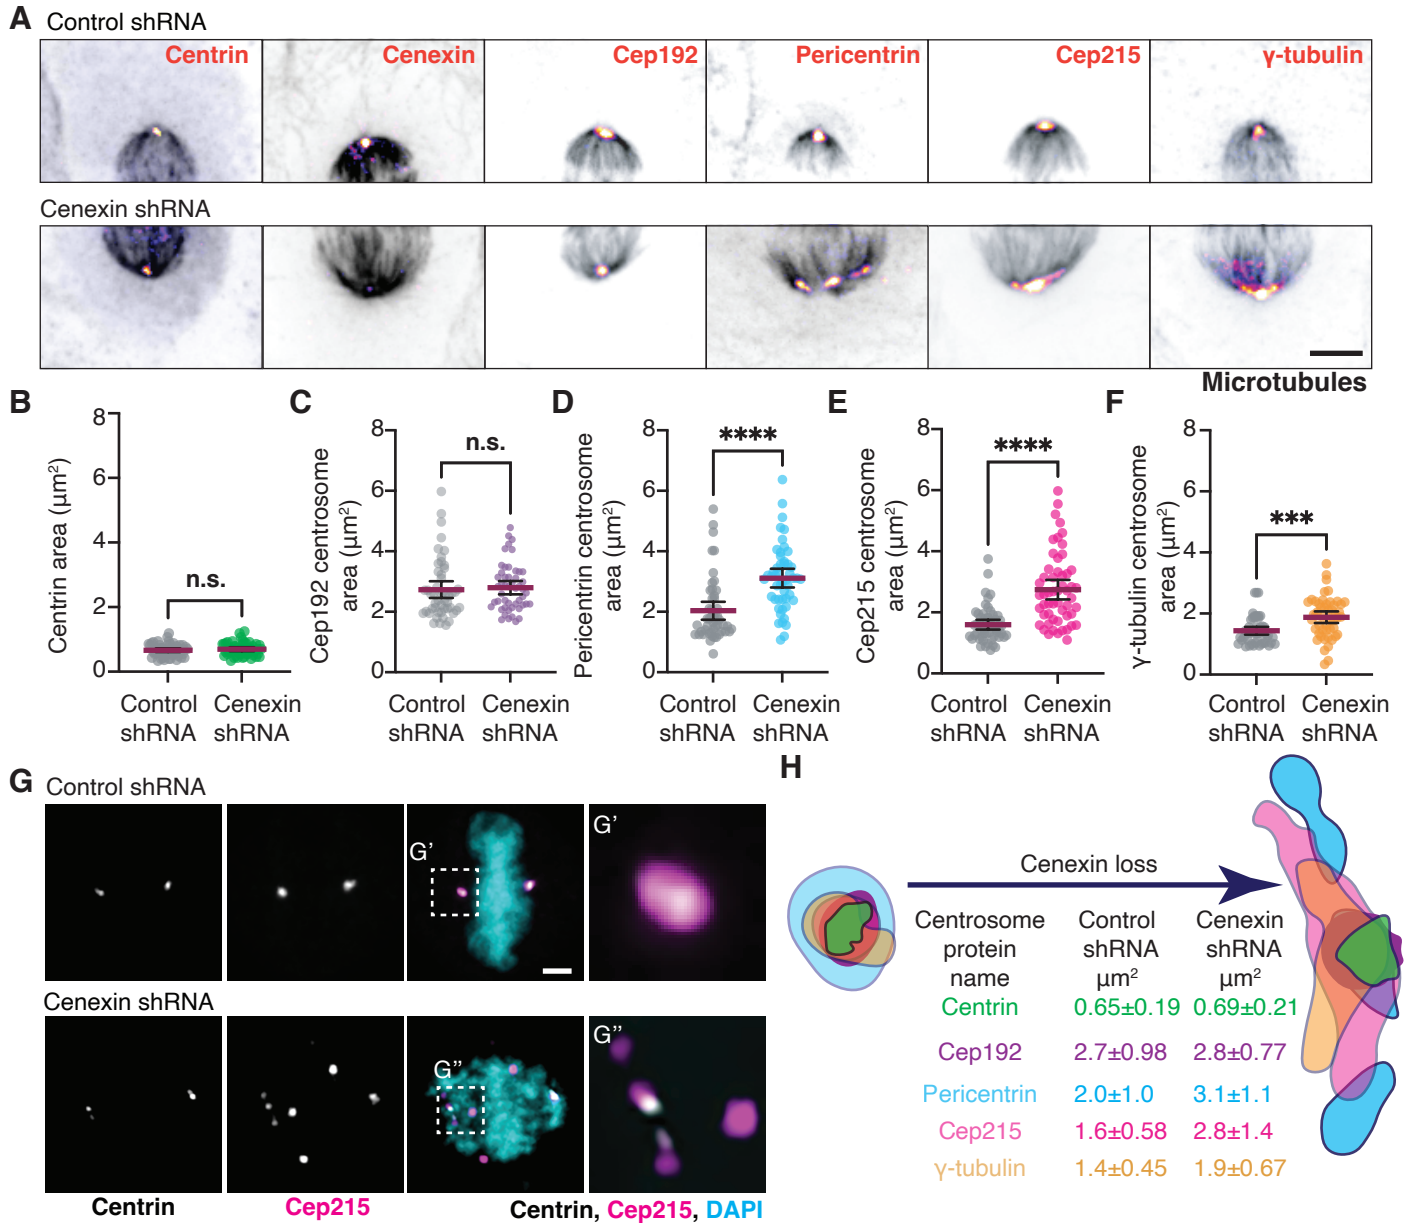

**Figure 1.** Cenexin loss results in PCM specific fragmentation

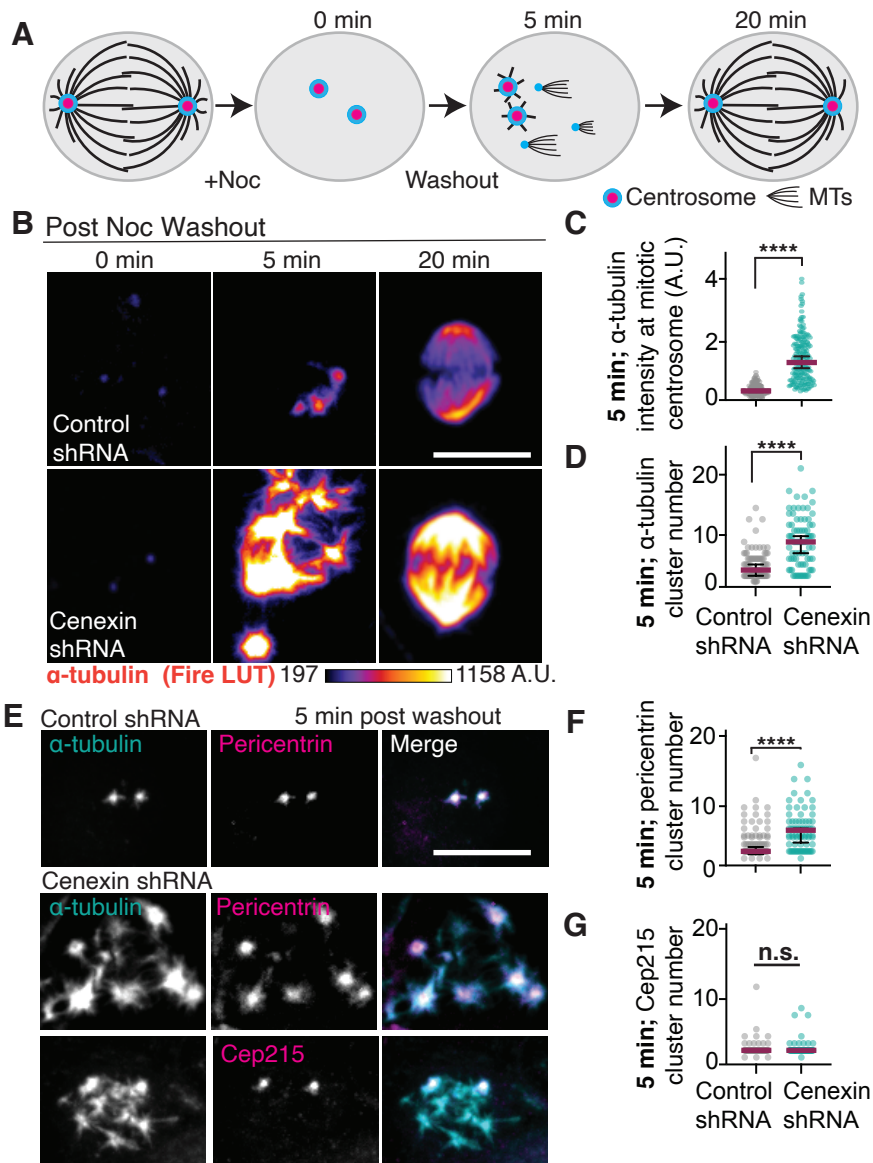

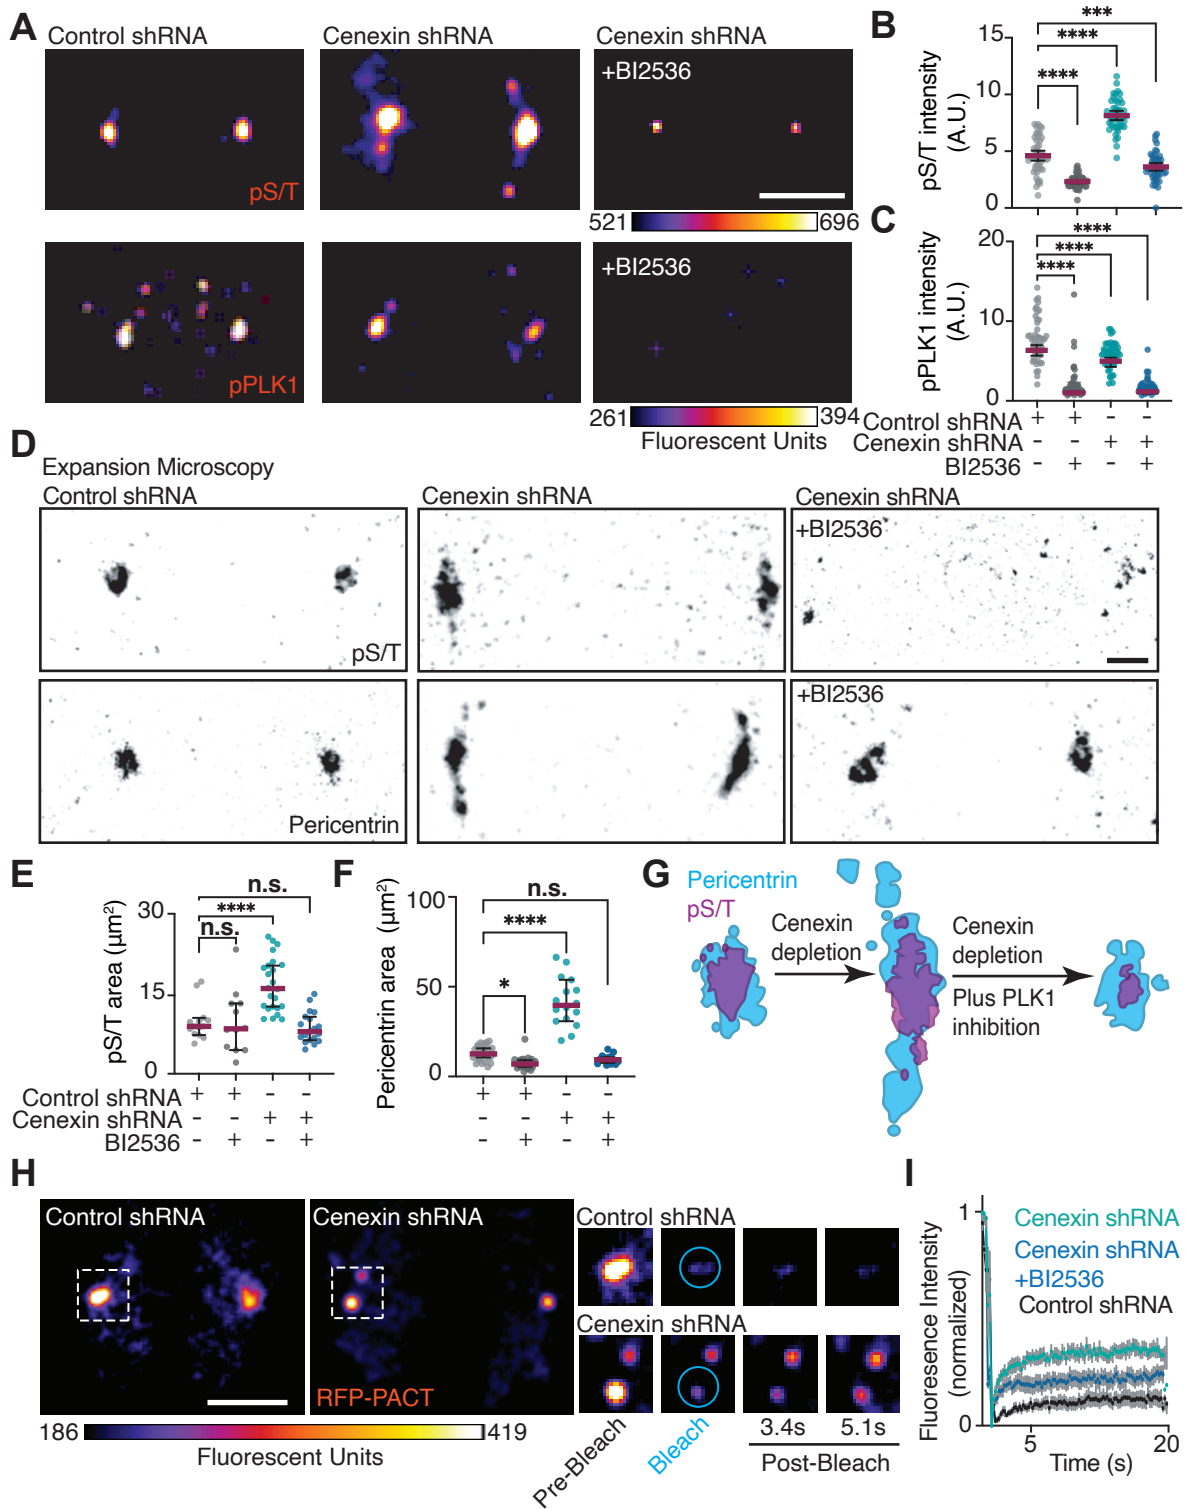

**Figure 3. Cenexin and PLK1 work together to maintain proper PCM organization**

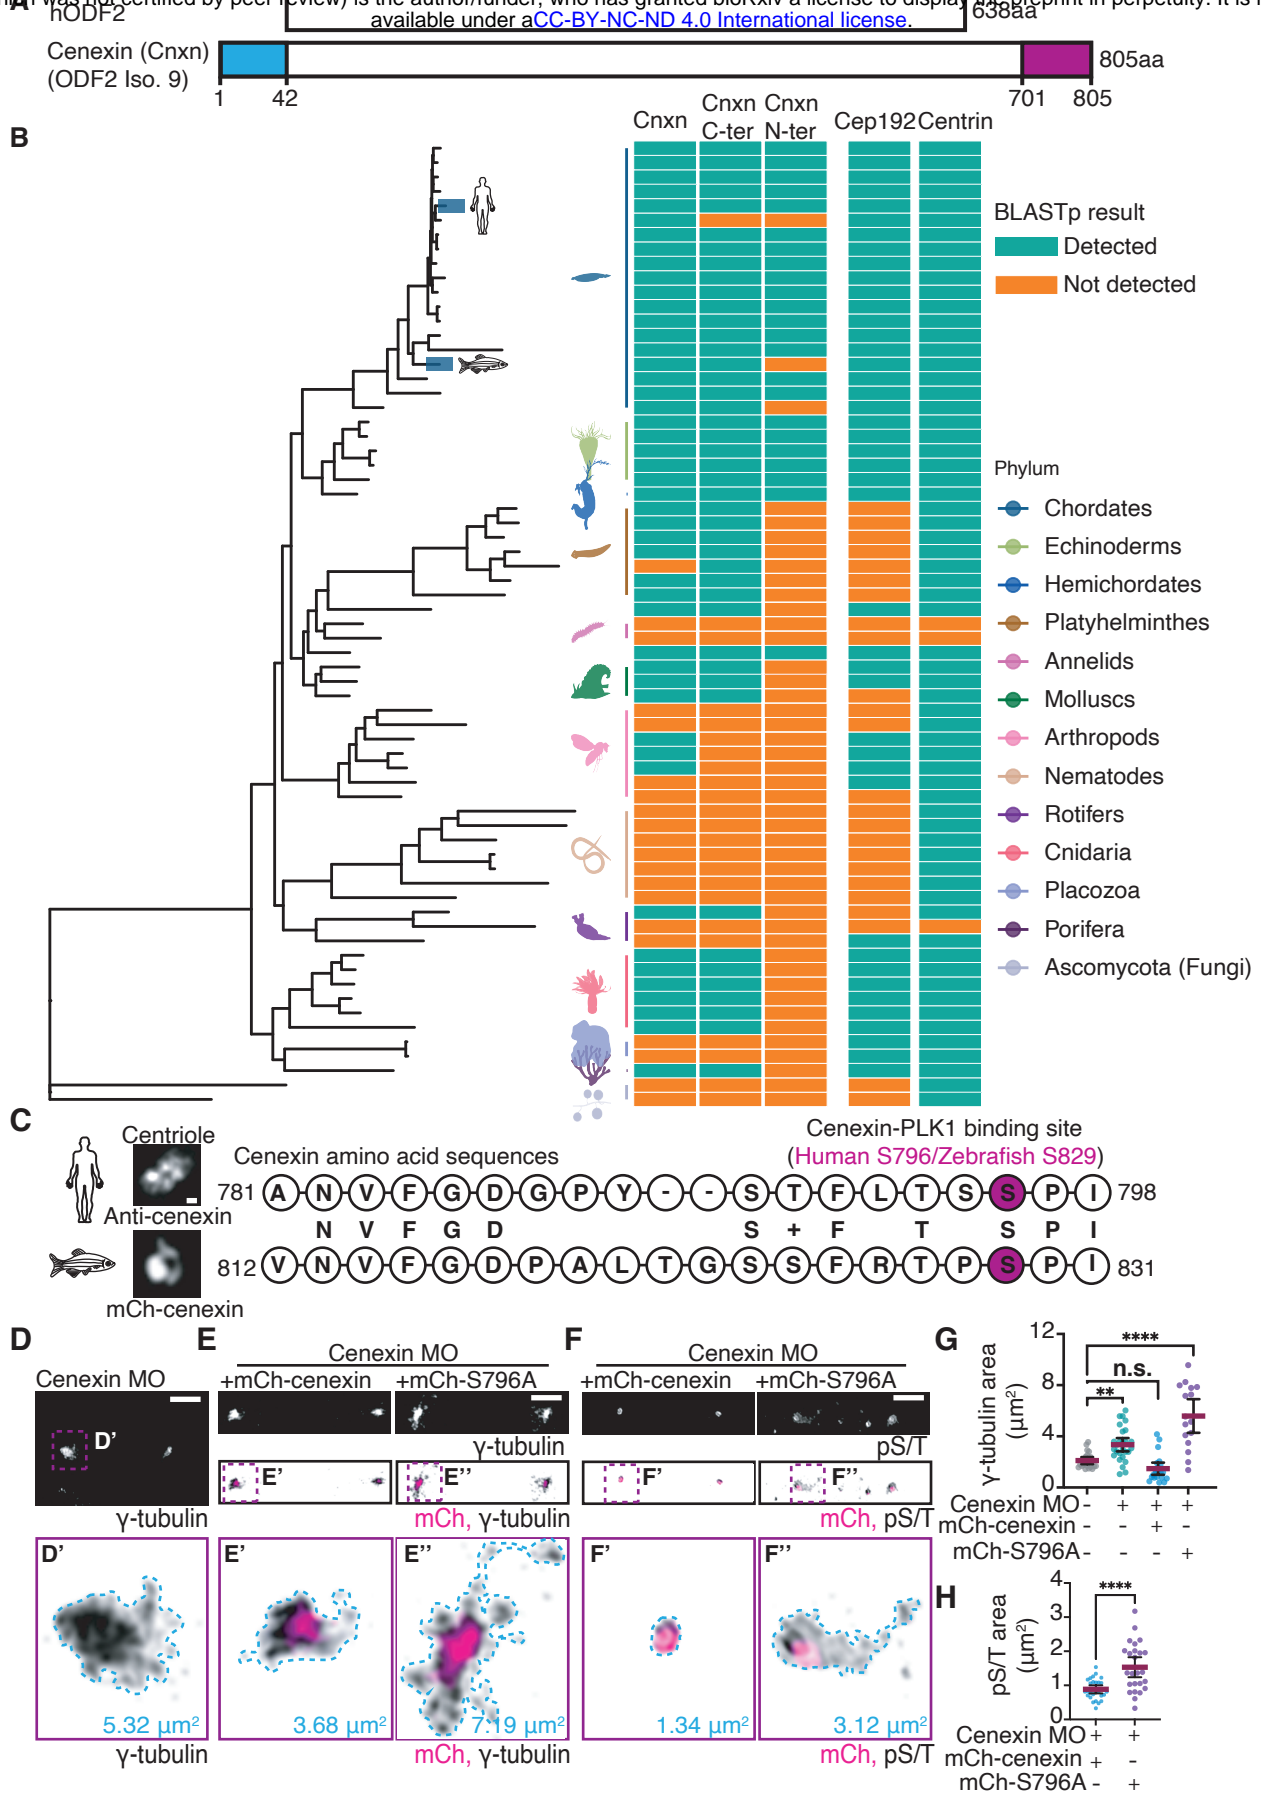

**Figure 4.** Cenexin phosphorylation at its conserved C-terminal PLK1 binding site is required for maintenance of PCM *in vivo*
